# Supplementary material for: Identification of Diagnostic Signatures and Immune Cell Infiltration Characteristics in Rheumatoid Arthritis by Integrating Bioinformatic Analysis and Machine-Learning Strategies
Source: PubMed Central journal article supplement (PMC8526926; doi:10.3389/fimmu.2021.724934), 2021-10-06
Supplement: Table_2.pdf [file Table_2.pdf]

| Gene      | logFC       | P.Value     |
|-----------|-------------|-------------|
| CPB2      | 2.258597498 | 0.0000274   |
| PANK4     | 2.035822922 | 0.0000851   |
| TAS2R1    | 1.084093314 | 0.000792951 |
| OTP       | 1.581643309 | 0.001320439 |
| CITED1    | 1.518049275 | 0.001476121 |
| ITPKB     | 1.480965932 | 0.001566372 |
| RASGEF1B  | 1.547565423 | 0.001740295 |
| PLSCR5    | 1.087256557 | 0.001962924 |
| TXNRD1    | 1.657426556 | 0.002210472 |
| AHRR      | 2.508125333 | 0.002356124 |
| PCGEM1    | 1.466254166 | 0.002480953 |
| CPNE6     | 1.410810392 | 0.00255386  |
| NFML      | 1.261808754 | 0.002586914 |
| CAF1      | 1.228684561 | 0.002655072 |
| SLC22A17  | 1.552983972 | 0.002662941 |
| CLC       | 1.266683488 | 0.002988659 |
| TMPRSS7   | 1.242443277 | 0.003336436 |
| MAT2B     | 1.29939276  | 0.003432668 |
| LPHN2     | 1.593882606 | 0.003468906 |
| PRKAA1    | 1.132884689 | 0.003579779 |
| MYEF2     | 1.63073776  | 0.003914372 |
| PVRL1     | 1.007137124 | 0.003955581 |
| SYS1      | 1.395908592 | 0.004391934 |
| PTGFRN    | 1.959181415 | 0.004462568 |
| KLF9      | 1.125936016 | 0.004735541 |
| CD99L2    | 1.164643179 | 0.00494351  |
| FOS       | 2.361477974 | 0.005151697 |
| FOXJ2     | 1.481659891 | 0.005329381 |
| ZNF646    | 1.495533992 | 0.005374688 |
| ADORA1    | 1.441470109 | 0.005451508 |
| DUSP1     | 1.864217354 | 0.005455016 |
| AFAP1     | 1.445372345 | 0.005805655 |
| EDA2R     | 1.371740411 | 0.005861041 |
| EGR1      | 3.797954328 | 0.005890302 |
| RBM3      | 1.284803681 | 0.00589614  |
| PIK3CB    | 1.11709621  | 0.006157529 |
| LOC149837 | 1.590568983 | 0.006317999 |
| ZFP36     | 1.392575868 | 0.006574782 |
| FONG      | 1.612144354 | 0.006658127 |
| C22orf24  | 1.11844302  | 0.006766518 |
| GPR78     | 1.178208175 | 0.00687593  |
| OC90      | 1.349246888 | 0.007730924 |
| NPHS2     | 1.374543917 | 0.007778251 |
| EI24      | 1.412950986 | 0.007820294 |
| STXBP6    | 1.036779854 | 0.007821056 |
| PRSS33    | 1.057592432 | 0.007945755 |
| C22orf35  | 1.05105876  | 0.007981715 |
| S100A12   | 1.073552081 | 0.00863871  |
| MC5R      | 1.30781931  | 0.008696971 |
| LHFPL5    | 1.263574117 | 0.00893799  |
| SLC25A26  | 1.343061508 | 0.009099441 |
| CTSB      | 1.180500282 | 0.009567485 |
| GPX1      | 1.11680107  | 0.009882169 |
| C1orf216  | 1.02702026  | 0.010028556 |
| ETS1      | 1.395422427 | 0.010028914 |
| TMEM176B  | 1.29815403  | 0.01063388  |
| OR2A9P    | 1.277771815 | 0.011245096 |

|           |             |             |
|-----------|-------------|-------------|
| UBE2D1    | 1.165682904 | 0.011547801 |
| IL3R2     | 1.044431991 | 0.011581348 |
| CBLL1     | 1.130633018 | 0.011798671 |
| EGR2      | 2.889423033 | 0.011969837 |
| PRDX3     | 1.578948078 | 0.012030539 |
| CD44      | 1.071663947 | 0.012173674 |
| ATP6V1E1  | 1.317938773 | 0.012304079 |
| FOXM1     | 2.281168956 | 0.012313736 |
| CD9       | 1.553648874 | 0.012502125 |
| A2ML1     | 1.144565365 | 0.012530586 |
| GLUL      | 1.081017422 | 0.012752449 |
| CRISPLD2  | 1.146678438 | 0.012892692 |
| SEC31A    | 1.015381059 | 0.01306704  |
| LOC643529 | 1.152670202 | 0.013427106 |
| MAPK3     | 1.036460777 | 0.013610329 |
| C15orf17  | 1.278129606 | 0.014369114 |
| MB21D2    | 1.369581676 | 0.014620346 |
| C22orf25  | 1.122511152 | 0.014726737 |
| C8orf31   | 1.153305779 | 0.01488454  |
| GABRD     | 1.055652976 | 0.014901854 |
| CX3CL1    | 1.141030056 | 0.015102367 |
| KANK2     | 1.372725001 | 0.015204284 |
| CD55      | 1.008065031 | 0.01524093  |
| MEOX2     | 1.517558791 | 0.015352696 |
| SLC3A2    | 1.186884917 | 0.015429103 |
| KIAA1467  | 1.144640912 | 0.015868734 |
| D21S2090E | 2.229152032 | 0.016129427 |
| DPYSL4    | 1.434408159 | 0.016143677 |
| RIN2      | 1.096848197 | 0.016449517 |
| RRAGD     | 1.182268338 | 0.016612481 |
| IL12RB2   | 1.136087967 | 0.016648466 |
| STC1      | 1.275534049 | 0.016685032 |
| HMGN4     | 1.091123921 | 0.016875056 |
| OLFM3     | 1.426943924 | 0.017043142 |
| TAGAP     | 1.234284194 | 0.017495256 |
| MAN1A1    | 1.135806991 | 0.017734034 |
| LRTM1     | 1.145745832 | 0.017791779 |
| MRPS36    | 1.14264422  | 0.018137272 |
| HBEGF     | 1.127468194 | 0.018848243 |
| F5        | 1.134299173 | 0.018862575 |
| VCL       | 1.230338206 | 0.019675174 |
| KRTAP15-1 | 1.272462914 | 0.020023681 |
| RNF157    | 1.660036876 | 0.020087209 |
| MXD4      | 1.362664296 | 0.020180945 |
| SERD      | 1.516776823 | 0.020329128 |
| EMP1      | 1.318744906 | 0.020672564 |
| ZNF597    | 1.094360683 | 0.020835932 |
| ITLN1     | 1.338191376 | 0.020972994 |
| C19orf22  | 1.314267764 | 0.021538769 |
| FAM117A   | 1.033712867 | 0.021539174 |
| NOC4L     | 1.06239982  | 0.021952742 |
| CDGH      | 1.24070818  | 0.022023962 |
| XPNPEP1   | 1.198400442 | 0.022202204 |
| MRGPRX2   | 1.833203424 | 0.022521613 |
| SRF       | 1.704102546 | 0.022616169 |
| C21orf104 | 1.361416268 | 0.022712716 |
| UFC1      | 1.190419123 | 0.02279068  |
| IL8       | 2.091875372 | 0.022934109 |

|           |             |             |
|-----------|-------------|-------------|
| IGF2      | 1.162776863 | 0.022963392 |
| IGFLR1    | 1.120979398 | 0.023157438 |
| CHRM1     | 1.011063067 | 0.023418141 |
| DPCP      | 1.298431454 | 0.02349989  |
| RAB13     | 1.192604885 | 0.024255582 |
| PLD6      | 1.1654828   | 0.02428127  |
| G0S2      | 3.339605412 | 0.024285499 |
| HOXA11    | 1.264210168 | 0.024490303 |
| NR4A2     | 1.034820269 | 0.024770885 |
| C17orf42  | 1.25136634  | 0.025094339 |
| BTG2      | 1.099529782 | 0.026649607 |
| SCOC      | 1.220968318 | 0.02671287  |
| ZNF177    | 1.613243686 | 0.027257083 |
| LINC00239 | 1.254153999 | 0.027359176 |
| COL3A1    | 1.123946279 | 0.027874656 |
| MIR100HG  | 1.426883075 | 0.028214108 |
| PHLDA3    | 1.283635433 | 0.028437649 |
| SPATA2    | 1.072557074 | 0.028898061 |
| FAM9B1    | 2.096740808 | 0.029268205 |
| NEUROD4   | 1.205644066 | 0.029278538 |
| ROBO3     | 1.084343079 | 0.029528334 |
| GNGT2     | 1.253622017 | 0.029740227 |
| CGF       | 1.561863681 | 0.030005297 |
| LMLN      | 1.845029556 | 0.030707839 |
| SRPK3     | 1.020249776 | 0.030775402 |
| LINC00347 | 1.148792967 | 0.031127344 |
| DCAF6     | 1.234538289 | 0.03136782  |
| RILP      | 1.018406938 | 0.03158144  |
| FAM6      | 2.014433516 | 0.03178432  |
| DHRS7     | 1.02718241  | 0.031818646 |
| LRRN1     | 1.513676403 | 0.031921276 |
| LOC199897 | 1.608168567 | 0.032191355 |
| SPANXN5   | 1.120106127 | 0.032523619 |
| PIM1      | 1.38919577  | 0.033490341 |
| SNCA      | 1.61282774  | 0.033531304 |
| LDOC1     | 1.246663269 | 0.033727908 |
| DEFA3     | 1.04275681  | 0.033767884 |
| KLRAP1    | 1.395552223 | 0.033868775 |
| NFKBIZ    | 1.107230207 | 0.033977065 |
| HOXD2     | 1.365379891 | 0.034340678 |
| ANP32D    | 1.020983322 | 0.034348489 |
| LEPRE1    | 1.635630837 | 0.034525215 |
| MAST3     | 1.003775985 | 0.035233688 |
| STEAP4    | 1.08202636  | 0.035343698 |
| MRPS10    | 1.07664626  | 0.035709246 |
| NDUFV2    | 1.02985295  | 0.036507451 |
| CHST9     | 1.170185678 | 0.036564601 |
| SRRD      | 1.110414736 | 0.0368991   |
| STK38     | 1.080464857 | 0.036965381 |
| KLHDC8A   | 1.111434454 | 0.036979222 |
| ILBF      | 1.031984827 | 0.037088599 |
| TADA2B    | 1.298711023 | 0.03797484  |
| DACT1     | 1.439521368 | 0.038445915 |
| TLK1      | 1.076468952 | 0.038573267 |
| C11orf88  | 1.358793393 | 0.038620034 |
| ADAM20    | 1.100649444 | 0.039088945 |
| PRUNE     | 1.285857797 | 0.039262315 |
| NOC2L     | 1.180392745 | 0.03930318  |

|              |              |              |
|--------------|--------------|--------------|
| PRSS36       | 1.036787047  | 0.039780671  |
| RNASE4       | 1.099768043  | 0.040325548  |
| PRF1         | 1.079146261  | 0.040586957  |
| ALDH1A3      | 1.067987171  | 0.04058755   |
| FBXO9        | 1.095457368  | 0.040604779  |
| SOCS3        | 1.332735027  | 0.04079073   |
| NEK6         | 1.136305851  | 0.04090714   |
| C1orf145     | 1.445431102  | 0.04126177   |
| TCF19        | 1.196181901  | 0.041474475  |
| PIGL         | 1.179285848  | 0.041476058  |
| TBX19        | 3.138882541  | 0.041707947  |
| ASCC2        | 1.160226168  | 0.041744226  |
| H19          | 1.04684409   | 0.042303601  |
| LEKR1        | 1.019162375  | 0.042438414  |
| EGR4         | 1.024844605  | 0.043052319  |
| YEATS4       | 1.018099614  | 0.043152725  |
| C22orf30     | 2.024825089  | 0.043397214  |
| NSUN3        | 1.19941204   | 0.043813002  |
| MTERF        | 1.194660884  | 0.044385186  |
| LOC285456    | 1.610726186  | 0.0444441471 |
| DNAJA4       | 1.094355941  | 0.044906625  |
| SSR2         | 1.195365057  | 0.044950596  |
| MRC2         | 1.125449894  | 0.04517279   |
| ARNT         | 1.228357477  | 0.045505275  |
| RNF41        | 1.075818286  | 0.045915112  |
| PDE6H        | 1.279101281  | 0.046634599  |
| ADIPOR1      | 1.515090446  | 0.047530045  |
| PPP4R1L      | 1.110243082  | 0.047671509  |
| HCFC2        | 1.087093911  | 0.047977124  |
| CGN          | 1.150079718  | 0.048347641  |
| USP28        | 1.178062797  | 0.048373617  |
| CEPB         | 1.178163209  | 0.048580083  |
| KLC3         | 1.013702256  | 0.04924037   |
| ALAS2        | 1.10362723   | 0.049771325  |
| CSRP2        | -4.294392087 | 4.34E-09     |
| IL28         | -2.547911362 | 0.00000718   |
| C2orf27      | -2.343688965 | 0.00000871   |
| SCN4B        | -1.871816089 | 0.0000139    |
| FAM64A       | -2.124589567 | 0.0000224    |
| FAM95B1      | -1.776337563 | 0.0000251    |
| HOXA2        | -2.431652456 | 0.000027     |
| ENTPD3       | -1.934303252 | 0.0000312    |
| LOC652276    | -1.718142651 | 0.0000337    |
| CERCAM       | -1.778978881 | 0.0000347    |
| FAM48B1      | -1.620002641 | 0.0000447    |
| MUC5B        | -2.481493404 | 0.0000481    |
| A1CF         | -1.704692731 | 0.000062     |
| ASPRV1       | -3.439277843 | 0.0000655    |
| GJC3         | -2.448756366 | 0.0000755    |
| SLC22A13     | -2.534094378 | 0.0000758    |
| WFDC5        | -2.042521599 | 0.000103582  |
| CCL5         | -1.624349867 | 0.000108594  |
| SIM1         | -1.691391911 | 0.000119327  |
| LOC100129785 | -2.533683823 | 0.000121187  |
| PAR4         | -2.508026974 | 0.000124424  |
| PRKD1        | -1.635652074 | 0.000132449  |
| FAM163B      | -1.700318734 | 0.000132535  |
| TMEM235      | -1.623811421 | 0.000159417  |

|              |              |             |
|--------------|--------------|-------------|
| FLJ43903     | -3.607422437 | 0.000203405 |
| LHX1         | -3.423309326 | 0.000217002 |
| C17orf74     | -4.158452241 | 0.000224061 |
| EYA2         | -1.428408047 | 0.000226888 |
| HMCN1        | -1.625293986 | 0.000228608 |
| LINC00301    | -1.699405923 | 0.000235287 |
| FOXQ1        | -1.583090492 | 0.000254667 |
| PLEKHH3      | -2.061941978 | 0.000257981 |
| MS4A4E       | -1.916592274 | 0.000267083 |
| MIR17HG      | -1.548819026 | 0.00027881  |
| PDLIM4       | -1.393117579 | 0.000286473 |
| CD300LG      | -2.266347988 | 0.000291826 |
| B4GALNT1     | -1.552735739 | 0.000320008 |
| TMEM174      | -2.085472808 | 0.000327273 |
| GPR98        | -1.500894666 | 0.000331517 |
| FLJ25917     | -1.860131698 | 0.000332558 |
| ZCCHC23      | -1.870161417 | 0.000344348 |
| C14orf41     | -1.699715596 | 0.000348674 |
| SELV         | -1.419471036 | 0.000357735 |
| GOLGA6A      | -1.347938057 | 0.000375214 |
| C2orf16      | -3.86379256  | 0.000384317 |
| SLC22A24     | -1.373405383 | 0.000403228 |
| LOC200726    | -2.072769585 | 0.000403311 |
| NPTX1        | -2.285296825 | 0.000425491 |
| GDF10        | -1.44985278  | 0.000435064 |
| STXBP1       | -2.808256496 | 0.000436838 |
| IQCF2        | -1.29621118  | 0.000438806 |
| LOC100652742 | -1.653071724 | 0.000442292 |
| CREB3L3      | -2.045282772 | 0.000444467 |
| SERPINA4     | -1.265393953 | 0.0004454   |
| COL4A1       | -1.856048445 | 0.000446919 |
| LOC100129213 | -1.701847205 | 0.000453702 |
| FGF3         | -3.336012938 | 0.000454205 |
| TCF15        | -2.379149813 | 0.0004635   |
| DGCR9        | -1.314015224 | 0.000468552 |
| C17orf82     | -1.322334562 | 0.0004706   |
| ADD3         | -1.641020235 | 0.000474916 |
| VSTM2L       | -2.289098084 | 0.000475697 |
| LOC283856    | -1.442485979 | 0.00047836  |
| OR1F1        | -2.180959559 | 0.000485684 |
| LOC390705    | -1.853617142 | 0.000506243 |
| CCDC64B      | -2.504569742 | 0.000508721 |
| PIP          | -2.43534989  | 0.000513613 |
| KIRREL3-AS3  | -1.732785548 | 0.000534309 |
| C4orf50      | -1.502157324 | 0.000563568 |
| LOC100128320 | -2.072156559 | 0.000575238 |
| DEFB107A     | -2.225454651 | 0.000576026 |
| OVOS2        | -2.373224567 | 0.000577075 |
| DLK2         | -1.137456018 | 0.000579034 |
| CFL1P1       | -1.750034623 | 0.00058306  |
| PSG10P       | -2.079453783 | 0.000587933 |
| LRP2         | -2.969825473 | 0.000594497 |
| LOC728671    | -1.860295704 | 0.000604731 |
| C2orf61      | -1.657057298 | 0.000611752 |
| MAST4        | -1.274290695 | 0.00062205  |
| HTR6         | -1.67780665  | 0.000622194 |
| ZNF16        | -1.794770789 | 0.000623929 |
| ADAMTS16     | -1.159578264 | 0.000653133 |

|              |              |             |
|--------------|--------------|-------------|
| LOC729080    | -1.508222737 | 0.000670785 |
| MIER1        | -1.387901018 | 0.000684553 |
| ZNF556       | -1.616604969 | 0.000692257 |
| DPCR1        | -2.217471338 | 0.000701495 |
| FGL1         | -1.698970436 | 0.000708776 |
| OR4C6        | -3.211448914 | 0.000720705 |
| ZDHHC8P1     | -1.64847419  | 0.000732336 |
| DPYSL3       | -2.260628013 | 0.000747659 |
| LANCL3       | -1.529418472 | 0.000751187 |
| GRM4         | -1.590275009 | 0.000768923 |
| TMEM150A     | -2.196602742 | 0.000770947 |
| LOC285103    | -1.377637666 | 0.000786638 |
| CLIP2        | -1.081590421 | 0.00081644  |
| SCGB1D2      | -1.148069504 | 0.000830754 |
| OTUD7A       | -1.349543278 | 0.000846028 |
| TRH          | -3.10881331  | 0.000853623 |
| LOC100132474 | -1.532567778 | 0.000869713 |
| C7           | -1.807323836 | 0.000879324 |
| RASD1        | -1.667664303 | 0.000880262 |
| ND4L         | -1.707193825 | 0.00088296  |
| FAM48B2      | -2.177755861 | 0.000897418 |
| FZD9         | -2.253199296 | 0.000912927 |
| TBX6         | -2.091521555 | 0.000947518 |
| GABRE        | -1.801090358 | 0.000955287 |
| LOC100129048 | -1.094543559 | 0.000964429 |
| CYP11B1      | -1.635750466 | 0.000992909 |
| LOC100652922 | -1.9436937   | 0.000994131 |
| OR10R3P      | -1.118049271 | 0.001015213 |
| LOC283270    | -1.993976165 | 0.001027851 |
| GPT          | -2.881176979 | 0.001037427 |
| PTK6         | -1.499704083 | 0.001043097 |
| HOXA6        | -1.419990855 | 0.001049093 |
| RPL39        | -1.191002897 | 0.001054054 |
| MEP1A        | -1.635129655 | 0.001056451 |
| CCL20        | -1.990499021 | 0.001071841 |
| PODNL1       | -1.488894687 | 0.001073147 |
| SLC2A12      | -1.410238275 | 0.001081502 |
| RBP5         | -1.590745382 | 0.001093696 |
| PLEKHN1      | -1.785753173 | 0.00111481  |
| SOX21        | -1.21164401  | 0.001119009 |
| GINS2        | -2.437038302 | 0.001125305 |
| LOC100129148 | -1.429795595 | 0.001128194 |
| FADS6        | -2.102118671 | 0.001131235 |
| SNAR-C3      | -2.320194714 | 0.00116078  |
| NEUROG1      | -1.284552832 | 0.001161247 |
| KRTAP19-1    | -2.231581327 | 0.001172936 |
| LOC441204    | -1.599621499 | 0.001175067 |
| LOC100130954 | -2.114173274 | 0.00117947  |
| DYNC2LI1     | -1.297690999 | 0.001193268 |
| MYOD1        | -2.285421322 | 0.001210564 |
| FLJ30403     | -1.697468324 | 0.00122654  |
| GAF1         | -1.05405986  | 0.001238208 |
| AACSP1       | -2.374155163 | 0.001248457 |
| NAG20        | -1.525398069 | 0.001249014 |
| NKAPP1       | -2.929541412 | 0.001249489 |
| LOC100130800 | -1.7662254   | 0.001257031 |
| FAM19A4      | -2.713044144 | 0.001258055 |
| GJD4         | -1.370524316 | 0.001281919 |

|              |              |             |
|--------------|--------------|-------------|
| L2HGDH       | -1.494509871 | 0.001284121 |
| OR5I1        | -1.371702054 | 0.001315081 |
| LINC00302    | -1.479205965 | 0.00132847  |
| ADH4         | -1.813180145 | 0.001367703 |
| OR7D4        | -1.347854869 | 0.001370115 |
| LOC399939    | -1.650711413 | 0.001401673 |
| POM121L8P    | -2.218789727 | 0.001407141 |
| TCEB3C       | -2.383951982 | 0.00140938  |
| OR2L3        | -1.416828618 | 0.001413886 |
| ACTH1        | -1.350216256 | 0.001417755 |
| INHBA        | -1.724782836 | 0.001418529 |
| BTG1         | -2.528701226 | 0.001422216 |
| LOC646498    | -1.500512828 | 0.001423936 |
| PTGER1       | -1.726838497 | 0.001428524 |
| RDM1         | -1.349833781 | 0.001437063 |
| SOST         | -1.271190704 | 0.001437547 |
| DGCR10       | -1.633877135 | 0.001439085 |
| PDILT        | -1.537003381 | 0.001443331 |
| LOC647983    | -1.708968286 | 0.001446911 |
| OR10A6       | -1.215521754 | 0.001468445 |
| CDH4         | -1.853811487 | 0.001532025 |
| BCL2L10      | -1.691684222 | 0.00154752  |
| LOC389199    | -1.872836959 | 0.001595546 |
| SGK196       | -3.215728466 | 0.001599077 |
| C1orf138     | -1.682025293 | 0.00164114  |
| CENPO        | -1.149039305 | 0.001657416 |
| OR2B9P       | -1.48507068  | 0.001670172 |
| LOC116437    | -1.16764713  | 0.001681989 |
| PCBP3-OT1    | -1.721356671 | 0.001683647 |
| LUZP4        | -1.152752359 | 0.001693053 |
| SULT4A1      | -1.222101601 | 0.001697502 |
| ASTL         | -1.747278831 | 0.001724603 |
| GSG1         | -1.112053632 | 0.001756413 |
| MMP14        | -3.026922763 | 0.001757786 |
| CEP72        | -1.262336053 | 0.001769004 |
| LOC100131170 | -1.595183479 | 0.001771581 |
| DKK3         | -1.132045866 | 0.001794253 |
| UGT1A6       | -1.130139534 | 0.001829009 |
| FAM106A      | -1.369013876 | 0.001852586 |
| SNORA80      | -1.614036671 | 0.001870348 |
| CHKA         | -1.307609305 | 0.001874273 |
| TMEM132E     | -1.404768396 | 0.001889343 |
| LOC100130278 | -1.254406864 | 0.00189461  |
| FAM5C        | -1.512943067 | 0.001900069 |
| LOC728208    | -1.207234335 | 0.001903248 |
| HSPA12B      | -1.963385249 | 0.001935314 |
| NODAL        | -1.275762701 | 0.0019382   |
| OSTBETA      | -1.156324393 | 0.00196788  |
| C11orf52     | -1.358643001 | 0.001972544 |
| LOC100134368 | -1.256990609 | 0.00199452  |
| ANKRD20A4    | -1.71042129  | 0.002000701 |
| PREX2        | -1.024643223 | 0.002004513 |
| GRHL3        | -1.206518906 | 0.002011986 |
| AVPR1B       | -1.353419947 | 0.00201224  |
| SHANK3       | -2.398613091 | 0.002025675 |
| SEMA6C       | -1.777723499 | 0.00203534  |
| HYAL1        | -2.679178979 | 0.002041051 |
| PRAMEF4      | -1.682554971 | 0.002051607 |

|              |              |             |
|--------------|--------------|-------------|
| MED1         | -1.233235367 | 0.002054137 |
| ARVP6125     | -2.002905227 | 0.002061783 |
| PLA2G4F      | -1.177957251 | 0.002063425 |
| LINC00467    | -1.149132094 | 0.002076848 |
| SYNDIG1L     | -1.761346774 | 0.002109285 |
| GPRIN1       | -1.15221167  | 0.002109506 |
| XAGE1A       | -1.344866411 | 0.002135955 |
| ZP4          | -1.231437525 | 0.002139165 |
| LOC100128653 | -1.222848609 | 0.002152956 |
| MAN1B1       | -1.788671388 | 0.002160587 |
| FAM41C       | -1.394091994 | 0.002163963 |
| OR4N4        | -1.544409268 | 0.002175455 |
| GPD1         | -2.657261719 | 0.002187045 |
| KCNB2        | -1.122733418 | 0.002222069 |
| MAGIX        | -1.035794171 | 0.002224269 |
| FAM71F1      | -1.562304705 | 0.002290875 |
| DCDC1        | -1.274160668 | 0.002295617 |
| EGFL6        | -1.248469607 | 0.002317378 |
| SERPINB7     | -1.236631173 | 0.002326982 |
| OR51L1       | -1.340899805 | 0.002329443 |
| IFITM5       | -1.760872732 | 0.00234087  |
| CA7          | -1.111636092 | 0.002344986 |
| PTPRH        | -1.357684772 | 0.002364705 |
| RNU105C      | -2.498579893 | 0.002370776 |
| FLJ42022     | -1.100190923 | 0.002378505 |
| THNSL2       | -1.058738516 | 0.002388154 |
| LOC100130354 | -1.728244414 | 0.002447109 |
| MEF8         | -1.182828991 | 0.002462827 |
| PRSS35       | -1.488088808 | 0.002503991 |
| GOLGA6L10    | -2.220512371 | 0.002519638 |
| SIGLEC6      | -1.763399107 | 0.002542045 |
| RBFOX1       | -2.599807669 | 0.002545287 |
| IL24         | -2.113701922 | 0.002591733 |
| GGT6         | -2.02045084  | 0.002638861 |
| MYLK2        | -1.427249485 | 0.002655954 |
| SHOX         | -1.760631933 | 0.002669988 |
| LOC100129775 | -1.363777324 | 0.002696778 |
| RNASE7       | -1.489968621 | 0.002705564 |
| CREG2        | -1.457101689 | 0.002708432 |
| FAM201B      | -1.556748975 | 0.002717767 |
| FGF17        | -1.674360624 | 0.002722211 |
| LOC642776    | -1.645581157 | 0.002726617 |
| TSPAN16      | -1.77599481  | 0.002727973 |
| ENTPD2       | -1.801753584 | 0.002730923 |
| TERT         | -1.558841985 | 0.00273773  |
| RNASE12      | -1.211313172 | 0.002775656 |
| LOC145837    | -1.293465952 | 0.002780595 |
| OR52E2       | -3.030169109 | 0.002783758 |
| LOC100507505 | -2.238771959 | 0.002825973 |
| LOC729770    | -1.922003841 | 0.002840872 |
| KCNK13       | -1.572317963 | 0.002856255 |
| GABRR1       | -1.458373076 | 0.002861694 |
| RAB36        | -1.639200595 | 0.002875625 |
| OR2M5        | -1.745273337 | 0.002895441 |
| LINC00273    | -2.667112565 | 0.002925871 |
| DUX3         | -2.225371564 | 0.002933861 |
| C22FG        | -1.424893459 | 0.00297525  |
| HOXB6        | -1.581381839 | 0.002988278 |

|              |              |             |
|--------------|--------------|-------------|
| ULBP2        | -1.250008158 | 0.002991136 |
| RUSC1-AS1    | -1.479730164 | 0.00299445  |
| TSFY26P      | -1.167066397 | 0.003061183 |
| TMEM52       | -1.261494706 | 0.003069132 |
| LINC00371    | -1.136886443 | 0.003078858 |
| SLC35G5      | -1.242366427 | 0.003082054 |
| LINC00112    | -1.604043794 | 0.003100721 |
| RUFY4        | -1.408915907 | 0.003102892 |
| MMP1         | -1.546089268 | 0.00311321  |
| LOC100128811 | -1.175393585 | 0.003130993 |
| PDE8B        | -1.623544121 | 0.003132427 |
| APOC4        | -1.035408115 | 0.003144191 |
| LOC283140    | -1.269651338 | 0.003158286 |
| LOC100653108 | -1.505049521 | 0.003169666 |
| LINC00111    | -2.283517985 | 0.003185398 |
| ERPI         | -2.885808003 | 0.003191104 |
| SPACA1       | -1.288724136 | 0.003207257 |
| SLC17A6      | -1.617644466 | 0.003239144 |
| PROX2        | -1.388520504 | 0.003265494 |
| CLCN2        | -1.310503604 | 0.003274063 |
| NNMT         | -3.245357325 | 0.003276317 |
| LGALS14      | -1.0580696   | 0.0032764   |
| LOC100653245 | -1.991313241 | 0.003282634 |
| C8orf74      | -1.423029348 | 0.003290572 |
| DNAJB3       | -1.551793653 | 0.003293998 |
| LOC284242    | -1.70312731  | 0.003305672 |
| SLC45A2      | -1.308572962 | 0.003317608 |
| SNORA60      | -3.997239982 | 0.003330065 |
| ST8SIA3      | -1.191022594 | 0.003340896 |
| RNF150       | -1.69691743  | 0.003343037 |
| ZNF662       | -1.425009585 | 0.003402124 |
| FAM83E       | -1.167365518 | 0.003406384 |
| CTSL3        | -1.246918388 | 0.003408962 |
| NACAD        | -1.163471189 | 0.003444987 |
| IGJ          | -2.788314361 | 0.003460413 |
| KCNN3        | -1.453878054 | 0.003466305 |
| SH3GL1P3     | -1.237212387 | 0.003475245 |
| BGN          | -2.014090294 | 0.003488457 |
| PCBD1        | -1.416355418 | 0.003494844 |
| IL36B        | -2.582544632 | 0.003496117 |
| C17orf47     | -1.548945411 | 0.003519906 |
| PSG8         | -1.15697575  | 0.00352112  |
| SCAMP5       | -1.233791794 | 0.003523859 |
| C20orf85     | -1.069783916 | 0.003553873 |
| MIA          | -1.388469416 | 0.003562675 |
| KNCN         | -1.431425553 | 0.003577843 |
| OR51G1       | -1.114691991 | 0.003589767 |
| C5orf64      | -1.542667255 | 0.003608267 |
| SPANXA1      | -1.221282137 | 0.00360937  |
| HIGD1B       | -1.491009695 | 0.003609407 |
| MPV17L       | -1.246168475 | 0.003662487 |
| LOC728613    | -1.891106544 | 0.003687645 |
| AOC4         | -1.490361675 | 0.003729775 |
| LOC100129393 | -1.402712581 | 0.003744724 |
| TRIM49       | -1.07560959  | 0.00374817  |
| RGL1         | -2.465130439 | 0.003748905 |
| KIAA1984     | -1.264738085 | 0.003749137 |
| LOC100132686 | -1.129784632 | 0.003749345 |

|              |              |             |
|--------------|--------------|-------------|
| C1orf98      | -1.675049096 | 0.003768105 |
| RAB19        | -1.037734272 | 0.003787819 |
| SERTM1       | -1.615393961 | 0.003796799 |
| PPP1CA       | -1.002796368 | 0.003830487 |
| FAM123C      | -1.059077488 | 0.003840435 |
| PEX11G       | -1.50792612  | 0.003854879 |
| TMEM54       | -1.216408572 | 0.003882996 |
| F7           | -2.564966685 | 0.00388534  |
| ZNRD1-AS1    | -1.340361059 | 0.003890498 |
| LOC284561    | -1.146977184 | 0.003926886 |
| ZNF833P      | -1.291271474 | 0.003965806 |
| LOC644554    | -1.91214335  | 0.003978076 |
| SGSM1        | -1.490809326 | 0.003987625 |
| HEATR4       | -1.07795397  | 0.003992428 |
| LOC653712    | -1.779423135 | 0.004007642 |
| IL36A        | -1.018293266 | 0.004016667 |
| LILRP2       | -1.223008524 | 0.004023715 |
| OR5AS1       | -1.955907309 | 0.004028593 |
| OR4F29       | -1.082925297 | 0.004037903 |
| TTY5         | -1.365072774 | 0.004058098 |
| TRIM17       | -1.061595155 | 0.004065895 |
| CSAG1        | -1.835524984 | 0.004090659 |
| LOC100128922 | -1.478070439 | 0.004147948 |
| LOC100131581 | -1.421980609 | 0.00416921  |
| LOC100133091 | -1.440858546 | 0.0041978   |
| MDFI         | -2.31442298  | 0.004239505 |
| FAM181B      | -1.147818999 | 0.004295907 |
| MAT1A        | -1.25963941  | 0.004316705 |
| TBC1D28      | -1.165955677 | 0.004338906 |
| SSX4B        | -1.676926111 | 0.00434219  |
| LINC00469    | -1.309282838 | 0.004355508 |
| IL26         | -2.034679725 | 0.004389123 |
| HSPB3        | -1.132293372 | 0.004397517 |
| CCL19        | -1.286868528 | 0.00441014  |
| RND157       | -1.018450314 | 0.00444341  |
| SERPINB13    | -2.336271122 | 0.004470791 |
| LOC100128851 | -1.260747006 | 0.004474595 |
| FBXO27       | -2.180098891 | 0.004478036 |
| ITGBL1       | -2.45533908  | 0.00448978  |
| DYNC111      | -1.324660883 | 0.004492154 |
| LOC642620    | -1.174723091 | 0.0045058   |
| LOC147670    | -1.741496377 | 0.004523366 |
| LAMA4        | -1.169651113 | 0.004526615 |
| LOC100130865 | -1.138576746 | 0.004540701 |
| LOC100131195 | -1.812060239 | 0.004561491 |
| OVOL2        | -1.315338433 | 0.004569906 |
| CD209        | -1.175368308 | 0.004574039 |
| EML5         | -1.181143118 | 0.004590607 |
| OR2T27       | -2.57773869  | 0.004617623 |
| IMP5         | -1.241937125 | 0.004646016 |
| FUT5         | -1.764771253 | 0.004689488 |
| GPM6B        | -1.124964656 | 0.004730601 |
| C16orf3      | -1.822932761 | 0.004750564 |
| PHYHIP       | -1.394253601 | 0.004762213 |
| LOC400743    | -1.453523121 | 0.004777895 |
| ONECUT3      | -1.397463615 | 0.004780106 |
| PLP1         | -2.507064435 | 0.004810828 |
| CENPT        | -1.256617377 | 0.004884771 |

|              |              |             |
|--------------|--------------|-------------|
| CT45A5       | -1.941977047 | 0.004893664 |
| LOC100134409 | -3.473536097 | 0.004931233 |
| HLA-E        | -1.510566026 | 0.004936958 |
| LOC392364    | -1.000711522 | 0.004937559 |
| CLP2         | -1.137602423 | 0.004956165 |
| LOC100131894 | -1.453515077 | 0.004992732 |
| LOC284219    | -1.964360757 | 0.004997284 |
| EFHC2        | -1.329866809 | 0.00511007  |
| GOLGA8F      | -1.398856342 | 0.00511518  |
| TRPC3        | -1.928772392 | 0.00512643  |
| C15orf59     | -1.496319847 | 0.005143494 |
| LOC283731    | -1.271100547 | 0.005157267 |
| UGT2B11      | -1.787143227 | 0.005181361 |
| RNF151       | -2.261200993 | 0.005222089 |
| LOC285300    | -1.163779457 | 0.005256282 |
| LOC253044    | -1.910444702 | 0.005270076 |
| MAP3K10      | -1.202778608 | 0.005312223 |
| LOC100128184 | -1.381531394 | 0.005328747 |
| LOC729668    | -1.367304514 | 0.005331162 |
| LINC00410    | -1.326930507 | 0.005385016 |
| NDP          | -1.013714838 | 0.00539154  |
| VAX2         | -2.15698335  | 0.005394426 |
| FLJ44124     | -2.515667234 | 0.005420219 |
| LOC729444    | -1.855119679 | 0.005447238 |
| ATP4B        | -1.271998962 | 0.005455482 |
| DNM1         | -1.005950143 | 0.005472038 |
| GSTTP2       | -1.757316569 | 0.005481553 |
| FAM166A      | -1.3824816   | 0.005490094 |
| WTIP         | -1.35682172  | 0.005491648 |
| LOC100270679 | -1.273695843 | 0.005495479 |
| LOC100130442 | -1.617795489 | 0.005545616 |
| FAM132B      | -1.219310045 | 0.005547701 |
| MDH1B        | -1.185202651 | 0.005552072 |
| TTY22        | -2.14327411  | 0.0055621   |
| TNC          | -1.262438068 | 0.00558717  |
| LOC63930     | -1.372198793 | 0.005623528 |
| PRSS27       | -1.553398738 | 0.005651198 |
| HSP90AB1     | -1.271909963 | 0.005685193 |
| LOC100288884 | -1.165956696 | 0.005706483 |
| DAND5        | -2.475160703 | 0.005714322 |
| C8orf66      | -1.664488572 | 0.005716498 |
| TEF          | -1.422106323 | 0.005757679 |
| ZNF682       | -1.186117967 | 0.005766886 |
| GOLGA6L6     | -1.117544283 | 0.00589393  |
| FLJ21408     | -1.463659927 | 0.005899154 |
| RARRES2      | -1.592735768 | 0.005916836 |
| IGLON5       | -1.486553854 | 0.005923257 |
| ITIH3        | -1.624798195 | 0.005931391 |
| IL32         | -1.774349757 | 0.005933782 |
| CD97         | -1.468818661 | 0.005955923 |
| LOC100128333 | -1.138126161 | 0.005978021 |
| EMR4P        | -1.070289802 | 0.005981879 |
| C1QTNF2      | -1.262360146 | 0.006004564 |
| LOC143286    | -1.467035598 | 0.006026517 |
| FAM180B      | -1.170785468 | 0.006114839 |
| IGSF11       | -1.596092864 | 0.006120176 |
| DDX24        | -1.128435511 | 0.006148394 |
| ZC3H10       | -1.039430782 | 0.006166738 |

|               |              |             |
|---------------|--------------|-------------|
| LYZL1         | -1.914310939 | 0.00619518  |
| CRMP1         | -1.63161877  | 0.006204421 |
| RFPL1-AS1     | -1.178261277 | 0.006220948 |
| STH           | -1.490492209 | 0.006235666 |
| PRKD2         | -1.428985875 | 0.006255343 |
| PGF           | -1.252995322 | 0.00631551  |
| ANKMY2        | -1.135734161 | 0.006336033 |
| C1QTNF1       | -1.344052077 | 0.006339132 |
| SNAR-C4       | -1.899621026 | 0.006341431 |
| KRTAP10-5     | -1.248425718 | 0.006347902 |
| REG3A         | -1.448383025 | 0.006378407 |
| OR7E37P       | -1.020661221 | 0.006403938 |
| SPDYE8P       | -2.282648811 | 0.006424355 |
| PRAMEF15      | -1.613675578 | 0.006425477 |
| C9orf79       | -1.241592488 | 0.006426869 |
| SH2D4B        | -1.019665033 | 0.006431586 |
| ADSSL1        | -1.027593073 | 0.00643642  |
| CASR          | -1.113147814 | 0.006444779 |
| TAF1L         | -1.852960474 | 0.006455285 |
| SH3D19        | -2.879598822 | 0.006505898 |
| CCDC135       | -1.495389883 | 0.006522822 |
| LOC100128751  | -1.158614725 | 0.006541534 |
| UBD           | -2.040618932 | 0.006576643 |
| ZC3H12D       | -1.402028791 | 0.006581277 |
| LSP1          | -1.69869343  | 0.006587346 |
| CRHR1         | -1.087232312 | 0.00660904  |
| OR56A4        | -1.474935352 | 0.006640183 |
| LOC389831     | -1.591358743 | 0.006708371 |
| LOC100129316  | -1.028324738 | 0.006724355 |
| OR4F6         | -1.092408655 | 0.006773978 |
| RDH13         | -1.020309628 | 0.006853222 |
| HMGB3P1       | -1.460745751 | 0.006875941 |
| TRDN          | -1.11586428  | 0.006879853 |
| HOXD12        | -1.703600062 | 0.006910762 |
| LOC202181     | -2.046872794 | 0.006943741 |
| MYOZ3         | -1.176537103 | 0.00697616  |
| LOC100128386  | -1.504760125 | 0.006997806 |
| GCM2          | -1.815352115 | 0.007009468 |
| LRSAM1        | -1.331746657 | 0.00704779  |
| KIAA1755      | -1.015428774 | 0.007079755 |
| PROM2         | -1.471349049 | 0.00709961  |
| LOC100127904  | -1.907592515 | 0.007139427 |
| LINC00242     | -1.706006017 | 0.007161137 |
| LOC100129125  | -1.60330386  | 0.007215071 |
| LOC100128531  | -1.117046608 | 0.007258984 |
| OVOS          | -1.096566227 | 0.007303072 |
| C1orf95       | -1.091309706 | 0.007312981 |
| MS4A15        | -1.023959386 | 0.007329346 |
| CDH24         | -2.285927942 | 0.007361114 |
| POLQ          | -1.215537751 | 0.007434881 |
| ZNF704        | -1.156800852 | 0.007475131 |
| C20orf166-AS1 | -1.323467993 | 0.007554554 |
| DCDC2B        | -1.587274252 | 0.007557262 |
| HCFL          | -1.516340818 | 0.007638208 |
| ARPM1         | -1.109615413 | 0.007662637 |
| PRKACG        | -1.189762122 | 0.007671711 |
| LOC100130849  | -1.213638425 | 0.007676795 |
| MYL3          | -1.225020952 | 0.007678644 |

|              |              |             |
|--------------|--------------|-------------|
| TAS2R14      | -1.222404998 | 0.007714502 |
| C6orf191     | -1.020379604 | 0.007720819 |
| C21orf106    | -1.268545306 | 0.007770086 |
| GATA4        | -1.060458521 | 0.007857126 |
| EIF4E1B      | -1.235509441 | 0.0078694   |
| RGMA         | -1.059280668 | 0.007881261 |
| ANKRD30BL    | -1.350631348 | 0.007896484 |
| TRPC6        | -1.020777718 | 0.007934121 |
| ZP3          | -1.242993504 | 0.007956969 |
| TECRL        | -1.670642631 | 0.008020155 |
| LOC100128366 | -1.053151936 | 0.008023051 |
| C4orf11      | -2.199004866 | 0.008133287 |
| KRT27        | -1.18497003  | 0.008196769 |
| RTKN         | -1.077412529 | 0.008216476 |
| ANKRD20A5P   | -1.262537492 | 0.008287323 |
| LOC285758    | -2.27641311  | 0.008304351 |
| SCARNA5      | -1.397718996 | 0.008311421 |
| HAPLN2       | -1.532018756 | 0.008315484 |
| LOC100132526 | -1.91972439  | 0.0083158   |
| LOC100130193 | -1.517217151 | 0.008342819 |
| CLSTN3       | -1.124490801 | 0.008352545 |
| LOC284669    | -1.713497662 | 0.008359958 |
| MYLPF        | -1.185442949 | 0.00839458  |
| LOC100131043 | -1.062031312 | 0.008468518 |
| LOC727677    | -1.129837505 | 0.008504291 |
| PTGR2        | -2.35481725  | 0.008522075 |
| SH3GL1P2     | -1.019453806 | 0.00853387  |
| AZFP         | -1.047981178 | 0.008567606 |
| SLC24A5      | -1.943056685 | 0.008573034 |
| C1orf61      | -1.118406754 | 0.008584761 |
| C10orf62     | -2.108257368 | 0.008630826 |
| PRSS47       | -1.052438763 | 0.008662142 |
| OR2L2        | -1.638726085 | 0.008721373 |
| BMP15        | -1.067961085 | 0.008870814 |
| GKN1         | -1.282779385 | 0.008879094 |
| CFL1         | -1.032614046 | 0.00899371  |
| LOC100287879 | -1.083393555 | 0.009040703 |
| AANAT        | -1.6180827   | 0.009043204 |
| FBXO44       | -1.104247498 | 0.009071975 |
| TAS2R30      | -1.117106202 | 0.00908092  |
| FAM196A      | -1.126733977 | 0.009162029 |
| FLJ34223     | -1.271677483 | 0.009212958 |
| MD5R         | -1.152135928 | 0.009262016 |
| ZSWIM5       | -1.255454088 | 0.009303248 |
| IL21         | -1.109544249 | 0.009321355 |
| SPTBN5       | -1.056055417 | 0.009401826 |
| C17orf72     | -1.443724095 | 0.009436946 |
| LOC442122    | -1.383405346 | 0.009478132 |
| S100A5       | -1.545612386 | 0.009508803 |
| OPN1MW       | -1.277749014 | 0.009526812 |
| LOC100272216 | -1.663820455 | 0.009566326 |
| FYN          | -1.220734444 | 0.009591905 |
| ANKRD63      | -1.044932993 | 0.009592602 |
| C7orf54      | -1.217559126 | 0.009599442 |
| FLJ37786     | -1.01716516  | 0.009601999 |
| LGALS7       | -2.255028714 | 0.00965887  |
| IL1RAPL1     | -1.534695361 | 0.009683816 |
| C7orf61      | -1.537186826 | 0.009722774 |

|              |              |             |
|--------------|--------------|-------------|
| RP9P         | -1.857398805 | 0.009800778 |
| KRTAP20-1    | -1.827565451 | 0.009844782 |
| SYNGAP1      | -1.048971427 | 0.009855269 |
| LGALS2       | -1.004677433 | 0.009861612 |
| ANKRD18A     | -1.141326057 | 0.009886122 |
| FOXD4        | -1.142393904 | 0.009962815 |
| MPP2         | -1.18583615  | 0.009974847 |
| DNM1P46      | -1.599210412 | 0.009981477 |
| FILIP1       | -1.057346385 | 0.010015944 |
| LOC100130480 | -2.173215914 | 0.010044951 |
| FLJ41327     | -1.250161073 | 0.01004998  |
| LOC100130579 | -1.374752019 | 0.010102334 |
| ASIP         | -1.24061176  | 0.010137437 |
| ATP4A        | -1.110747253 | 0.010173752 |
| OR2A5        | -1.574661074 | 0.010212768 |
| MAML3        | -1.009692037 | 0.010278528 |
| RAX2         | -1.326571348 | 0.01029109  |
| COTL1        | -1.605115515 | 0.010346803 |
| FLJ13224     | -1.006064237 | 0.010362206 |
| TAS2R60      | -1.882523755 | 0.010366991 |
| SLC28A1      | -1.060019611 | 0.010411701 |
| GDI2         | -1.028693583 | 0.010436926 |
| C1orf140     | -1.875663054 | 0.010482852 |
| PAX5         | -1.088182377 | 0.010503396 |
| UPK3A        | -1.482255404 | 0.010529118 |
| LOC388882    | -1.240506664 | 0.010621768 |
| POM121L1P    | -1.112430002 | 0.010644728 |
| LOC399829    | -1.326270176 | 0.010650993 |
| ST3GAL4      | -1.180463266 | 0.010656789 |
| OR7E5P       | -1.240517109 | 0.010658801 |
| CAND1        | -1.044696427 | 0.010706736 |
| FAM92A3      | -1.68861301  | 0.010766207 |
| GUCA2B       | -1.058979475 | 0.01078349  |
| KCNV2        | -1.219709753 | 0.010861182 |
| ZNF667       | -1.115774092 | 0.01087901  |
| SIX3         | -1.425898317 | 0.010889315 |
| KCNE4        | -1.66600411  | 0.010912413 |
| IGFALS       | -1.013234023 | 0.010918662 |
| LOC100233156 | -1.141513482 | 0.010961105 |
| AADAACL3     | -1.131437333 | 0.010977385 |
| KIAA1161     | -1.039841779 | 0.010980291 |
| OR2AT4       | -1.168513051 | 0.010985308 |
| DEFB132      | -1.180229776 | 0.010990156 |
| LOC729706    | -1.941396197 | 0.011031006 |
| PRSS16       | -1.49861727  | 0.011127141 |
| LCE2C        | -1.091654084 | 0.011129105 |
| PIH1D2       | -1.999944158 | 0.011136767 |
| LOC643669    | -1.283368963 | 0.011151572 |
| GTF2IRD1     | -1.17652301  | 0.011179711 |
| MGC23270     | -1.033333395 | 0.01134846  |
| LOC284412    | -1.023854156 | 0.011376873 |
| ARHGDIB      | -1.032454119 | 0.011382543 |
| SEZ6L        | -1.072905673 | 0.011397187 |
| KRTAP5-3     | -1.095923728 | 0.011472691 |
| KCNH6        | -1.417127866 | 0.011476171 |
| PRO0471      | -1.791790708 | 0.011508994 |
| GGNBP1       | -1.004324204 | 0.011571954 |
| NADKD1       | -1.520727358 | 0.011640927 |

|              |              |             |
|--------------|--------------|-------------|
| HOXB13       | -1.120515347 | 0.011662073 |
| ZNF503-AS2   | -1.395436218 | 0.011689056 |
| OR51V1       | -1.305876397 | 0.011733635 |
| TSPAN15      | -1.195700731 | 0.011758305 |
| LOC100131742 | -1.059783671 | 0.011769676 |
| C2orf66      | -1.085402118 | 0.01180386  |
| LOC100133131 | -1.214300506 | 0.011825809 |
| LOC283738    | -1.01948299  | 0.011825947 |
| CARD10       | -1.085005689 | 0.011866791 |
| LOC730139    | -1.821958348 | 0.011891547 |
| FLJ16126     | -1.046813914 | 0.011899825 |
| PPP4C        | -1.334157228 | 0.011905593 |
| PLAC4        | -1.188669443 | 0.011932111 |
| LRRC19       | -1.231629947 | 0.011980146 |
| DMBT1        | -1.207654424 | 0.012047959 |
| S100A14      | -1.412417511 | 0.012077374 |
| OR51D1       | -1.051757142 | 0.012086352 |
| MAFIP        | -1.963917495 | 0.01227558  |
| SLC12A8      | -1.428158593 | 0.01237302  |
| MCART6       | -1.073605183 | 0.012390769 |
| WFIKKN2      | -1.258087585 | 0.012408622 |
| MAGEC3       | -1.858045    | 0.012531331 |
| LOC729626    | -1.477213497 | 0.012656616 |
| CHRNA2       | -1.268874001 | 0.012678682 |
| ARHGAP39     | -1.160095413 | 0.012704836 |
| SSC5D        | -1.257404342 | 0.012738245 |
| CES3         | -1.275136089 | 0.012743915 |
| SPRR2E       | -1.037560118 | 0.012777087 |
| LOC100128640 | -1.099587601 | 0.012926577 |
| MMP2         | -1.463151796 | 0.01294583  |
| C16orf73     | -3.044670898 | 0.01297384  |
| LOC257152    | -1.584900635 | 0.012984111 |
| UPK1A        | -1.436147783 | 0.013018304 |
| VWA5B2       | -1.022476602 | 0.013060734 |
| ASS1         | -1.148290556 | 0.013121147 |
| LOC100130741 | -1.184734821 | 0.013149862 |
| SLC4A11      | -1.247913077 | 0.013212648 |
| FOXN4        | -1.012896205 | 0.013288183 |
| KRT18P55     | -1.099869394 | 0.013329668 |
| LOC100130285 | -1.213091887 | 0.013431441 |
| CHRNA2       | -1.391634166 | 0.013442922 |
| DHRS2        | -1.310248224 | 0.01344924  |
| HIST2H3A     | -1.670581801 | 0.01346821  |
| TSIX         | -1.17631171  | 0.01348761  |
| LOC146795    | -2.007671507 | 0.013514257 |
| LOC100144602 | -1.237839624 | 0.013591988 |
| KCNQ2        | -1.424315414 | 0.013682783 |
| C17orf105    | -1.035797261 | 0.013704045 |
| XRCC2        | -1.429734473 | 0.013714478 |
| KRTAP5-8     | -1.191847245 | 0.013873972 |
| TNFRSF19     | -1.327132596 | 0.013952158 |
| TXNDC2       | -1.484861678 | 0.013967412 |
| C8orf71      | -1.008867519 | 0.013975204 |
| SPINK14      | -1.34415601  | 0.014005813 |
| C18orf15     | -1.302112949 | 0.014119124 |
| LOC100128977 | -2.019980151 | 0.014297871 |
| ENTPD8       | -1.264010627 | 0.014623346 |
| CRYM-AS1     | -1.193635879 | 0.014636694 |

|              |              |             |
|--------------|--------------|-------------|
| LIPH         | -1.060933132 | 0.014728999 |
| IPO13        | -1.295188908 | 0.0147442   |
| RPA4         | -2.078652066 | 0.014748104 |
| CELF6        | -1.03033649  | 0.014791611 |
| RND1         | -1.003013523 | 0.014792738 |
| SH3BP5L      | -1.037381891 | 0.014821554 |
| FLJ33065     | -1.137801027 | 0.014824206 |
| TDGF1        | -2.665932634 | 0.014829994 |
| LOC100130175 | -1.196385004 | 0.014841485 |
| SLC30A3      | -1.109205334 | 0.015001488 |
| LOC400752    | -1.035728142 | 0.015042813 |
| LINC00479    | -1.46249376  | 0.015088296 |
| ABO          | -1.955963972 | 0.015117454 |
| FAM101A      | -1.480379542 | 0.015171082 |
| PRSS8        | -1.578294107 | 0.015186186 |
| LOC653061    | -1.920593728 | 0.015251674 |
| LGI4         | -2.605211297 | 0.015314215 |
| GLYAT        | -1.405386546 | 0.015351763 |
| LOC650293    | -1.643087833 | 0.015403121 |
| LOC100128501 | -1.061038009 | 0.015426388 |
| HIST1H2APS1  | -1.150068689 | 0.015473996 |
| LOC100132197 | -1.635927407 | 0.015582975 |
| LRRC3C       | -1.115716308 | 0.015602693 |
| VHLL         | -1.114918749 | 0.015622012 |
| PGAM5        | -1.097218918 | 0.01566971  |
| FZD4         | -1.182636077 | 0.015820854 |
| OR10G2       | -1.099708541 | 0.01586964  |
| GGT8P        | -1.518247841 | 0.015890666 |
| MUC13        | -2.405049667 | 0.015913424 |
| KLK8         | -1.141527355 | 0.01594529  |
| PHKG1        | -1.385224853 | 0.016018587 |
| TSGA10IP     | -1.936193163 | 0.016049086 |
| KRTAP12-2    | -1.015165719 | 0.016226961 |
| CCDC116      | -1.036283042 | 0.016245511 |
| CALHM3       | -1.315221939 | 0.016283147 |
| FAM90A7      | -2.066381638 | 0.016428165 |
| OR9H1P       | -2.629896776 | 0.016436223 |
| LOC100289650 | -1.338895216 | 0.016454731 |
| LOC440742    | -1.285555227 | 0.016464873 |
| HTATSF1P2    | -1.293734554 | 0.016576377 |
| LINGO2       | -1.646205091 | 0.016656956 |
| RPL23AP64    | -1.197295038 | 0.016820113 |
| CACHD1       | -2.511532815 | 0.01689968  |
| PRAMEF2      | -1.133847361 | 0.016908901 |
| OR2C1        | -1.253108639 | 0.017076619 |
| ART4         | -1.257530674 | 0.01717333  |
| SCN4A        | -1.019416991 | 0.017179823 |
| CDRT8        | -1.311920679 | 0.017253384 |
| HORMAD2      | -1.205379632 | 0.017332917 |
| KRTAP4-5     | -1.049495105 | 0.017509069 |
| RGPD6        | -1.932927608 | 0.017577545 |
| DKFZp451A211 | -1.067490142 | 0.017590862 |
| LOC100132014 | -1.269144693 | 0.017702438 |
| SUSD2        | -1.094122421 | 0.017759626 |
| LOC100287314 | -1.368558801 | 0.017763581 |
| GOLGA6L1     | -1.284565339 | 0.01783494  |
| LOC284950    | -1.230777357 | 0.017860577 |
| NKPD1        | -1.399998348 | 0.017873904 |

|              |              |             |
|--------------|--------------|-------------|
| CHP2         | -1.019372299 | 0.017896503 |
| CRX          | -1.300468043 | 0.017981221 |
| LOC100133319 | -1.014081513 | 0.018113334 |
| CIDEA        | -1.434863907 | 0.018113601 |
| LOC100499221 | -1.43209893  | 0.018122568 |
| PLA2G2F      | -1.14340584  | 0.018213124 |
| DNAJC5B      | -1.351204504 | 0.018282268 |
| GOLGA7B      | -1.087824148 | 0.018303032 |
| LOC100130542 | -1.023930693 | 0.018340397 |
| SLC9A4       | -1.73840762  | 0.018378256 |
| LOC100128001 | -1.515895851 | 0.018395579 |
| SCXA         | -1.064838879 | 0.018415366 |
| HOXB5        | -1.275131216 | 0.01845774  |
| OR2T6        | -1.045284094 | 0.01852569  |
| NANOG        | -1.220075451 | 0.018626133 |
| TTC9B        | -1.570509091 | 0.018738477 |
| OR2M7        | -1.305372589 | 0.018745951 |
| FLJ45079     | -1.10747855  | 0.018761153 |
| GAMT         | -1.096678144 | 0.018862576 |
| PGPEP1L      | -1.279722055 | 0.018892327 |
| SLC22A25     | -1.015844531 | 0.018900328 |
| FGF14-IT1    | -1.242579531 | 0.018943527 |
| ZDHHC22      | -1.512943918 | 0.019030181 |
| LOC100130453 | -1.123208413 | 0.019247348 |
| OR2V2        | -1.127423422 | 0.019267126 |
| RDH8         | -1.084951791 | 0.019291936 |
| PRINS        | -1.53351848  | 0.019301216 |
| LOC340515    | -1.641943738 | 0.019378252 |
| ARTN         | -1.050008621 | 0.019494415 |
| SULT6B1      | -2.183584448 | 0.019552539 |
| MST1P9       | -1.176232782 | 0.01989566  |
| NLRP7        | -1.239413333 | 0.019917215 |
| ACTG1        | -1.066351218 | 0.020008216 |
| REXO1L1      | -1.683947183 | 0.020045776 |
| TUBG2        | -1.350162131 | 0.020049155 |
| FOXL2        | -1.444288727 | 0.020095474 |
| LOC158572    | -1.47486158  | 0.020139972 |
| LOC100506533 | -1.026476366 | 0.020181767 |
| LOC286154    | -1.157041567 | 0.020323472 |
| PCDH10       | -1.413479941 | 0.020365892 |
| BRSK1        | -1.134384145 | 0.020412391 |
| LOC144817    | -1.000319136 | 0.020448324 |
| SETMAR       | -1.037255771 | 0.020462236 |
| LOC100289079 | -1.031388438 | 0.020463613 |
| SFRP1        | -1.18600646  | 0.020480361 |
| BUB1B        | -1.582456691 | 0.020527668 |
| FAM25A       | -1.314108701 | 0.020550056 |
| SLC32A1      | -1.506893656 | 0.020592133 |
| LOC100128950 | -1.191067156 | 0.020594536 |
| MTMR10       | -1.048817298 | 0.020785421 |
| STK16        | -1.734974156 | 0.020896506 |
| LOC100128644 | -1.134073675 | 0.020908022 |
| GLOD5        | -1.314007746 | 0.021110018 |
| LOC143666    | -1.509057958 | 0.021121537 |
| MGC4859      | -1.100191972 | 0.021141897 |
| LOC338667    | -3.152794077 | 0.021173575 |
| LRRRC14B     | -1.968001035 | 0.021290231 |
| DUSP26       | -2.051581022 | 0.021382436 |

|              |              |             |
|--------------|--------------|-------------|
| EXTL1        | -1.279056993 | 0.02161604  |
| ACBD7        | -1.452915989 | 0.021693171 |
| IGSF21       | -1.083907966 | 0.021723799 |
| FSTL3        | -1.177591366 | 0.021996481 |
| GPR101       | -2.02700946  | 0.022186121 |
| DLX4         | -1.411006861 | 0.022205659 |
| GDF1         | -1.687777252 | 0.02223232  |
| FAM27L       | -1.445727255 | 0.022458797 |
| GPHA2        | -1.027682173 | 0.022484674 |
| LOC402160    | -1.150721858 | 0.022584664 |
| LOC731779    | -1.135963231 | 0.022628413 |
| OR2Z1        | -1.589505509 | 0.022638109 |
| LOC147004    | -1.440581895 | 0.022654493 |
| FAM27A       | -1.327288778 | 0.022664897 |
| FAIM3        | -1.139530144 | 0.02273643  |
| SH3RF2       | -1.577018409 | 0.022821591 |
| LRIT1        | -1.927475024 | 0.022866905 |
| RAP1GAP      | -1.105215669 | 0.022871667 |
| SPDYE3       | -1.525718936 | 0.022991459 |
| DBX1         | -1.229073911 | 0.023038961 |
| CPNE9        | -1.160860362 | 0.023059285 |
| PTGR1        | -1.723947206 | 0.023255755 |
| GHDC         | -1.059351739 | 0.023544526 |
| FUT7         | -1.048417683 | 0.023613099 |
| LOC100128226 | -1.222547287 | 0.023616374 |
| MCC          | -1.153551044 | 0.023684462 |
| FLJ35424     | -1.2902432   | 0.023873447 |
| SOX3         | -1.565844837 | 0.023942583 |
| NEAT1        | -1.344802758 | 0.024339984 |
| CSH1         | -1.046565213 | 0.024377621 |
| GBX2         | -1.637049297 | 0.024396333 |
| KRT79        | -1.199933732 | 0.02453818  |
| LCE3A        | -1.723204741 | 0.024581532 |
| ADRA2C       | -1.729221335 | 0.024621555 |
| OPALIN       | -1.030833387 | 0.024639796 |
| LOC100132859 | -1.656354715 | 0.024778074 |
| MYCNOS       | -1.150798661 | 0.024849936 |
| CHSY3        | -1.215719009 | 0.024879752 |
| DMC1         | -1.037919525 | 0.024889723 |
| OR8H2        | -1.999523108 | 0.02503997  |
| CD86         | -1.895145621 | 0.02522629  |
| SRPX         | -1.109133722 | 0.025311244 |
| LINC00328    | -1.363402779 | 0.025395339 |
| LOC389602    | -1.115982028 | 0.025414245 |
| KRTAP10-4    | -1.106758858 | 0.025420074 |
| COL13A1      | -1.125594719 | 0.025567772 |
| SHANK1       | -1.53605527  | 0.025609751 |
| TACC2        | -1.370857406 | 0.025879519 |
| IL17RC       | -1.097150374 | 0.02593628  |
| TOB2P1       | -1.284839839 | 0.025941707 |
| MTSS1L       | -1.523833062 | 0.025981725 |
| TRIM31       | -1.037976926 | 0.026165938 |
| LOC399875    | -1.301471598 | 0.026239544 |
| UNQ9370      | -1.832007975 | 0.026276297 |
| BSX          | -1.197706764 | 0.02634811  |
| SHROOM1      | -1.002235493 | 0.026366491 |
| RNF165       | -1.31801223  | 0.026431789 |
| BRD7P3       | -1.489896159 | 0.026558591 |

|              |              |             |
|--------------|--------------|-------------|
| SLC35G1      | -1.475139013 | 0.026709097 |
| FLJ22763     | -1.217651174 | 0.026866858 |
| LOC100127885 | -1.393722076 | 0.026873726 |
| TNNT2        | -1.282413303 | 0.026909015 |
| C3orf51      | -1.298532229 | 0.026978429 |
| KRT8P41      | -1.325358045 | 0.026989257 |
| MAP4K5       | -1.064833551 | 0.027133073 |
| C22orf36     | -1.457061776 | 0.02728715  |
| P4HA2        | -1.157304498 | 0.027375884 |
| OLIG3        | -1.256954645 | 0.027385311 |
| ALDH1L1      | -1.029927487 | 0.027553237 |
| IGFL3        | -1.498932555 | 0.027606841 |
| LOC100131242 | -1.160837028 | 0.027809078 |
| GAGE7        | -1.882259127 | 0.028062853 |
| SORCS3       | -1.020707131 | 0.028321029 |
| BZRAP1       | -1.323587054 | 0.02835126  |
| MAGEA4       | -1.03641033  | 0.028383776 |
| ADRA1B       | -1.019466651 | 0.028507416 |
| KIR3DL3      | -1.839486617 | 0.028575828 |
| S100A3       | -1.145467552 | 0.028606191 |
| ABCA9        | -1.216976272 | 0.028692604 |
| UGT2B7       | -1.252963594 | 0.028792364 |
| KRTAP5-7     | -1.426048728 | 0.029020534 |
| LOC255654    | -1.551308992 | 0.029326275 |
| PEG3-AS1     | -1.268962588 | 0.029354828 |
| NLRP8        | -1.359977572 | 0.029477559 |
| SNORA73A     | -1.698846165 | 0.029737635 |
| TRAIP        | -1.245269913 | 0.029967827 |
| PRG2         | -1.179981361 | 0.030084104 |
| LOC728723    | -1.301442563 | 0.030236678 |
| CDH16        | -1.819584183 | 0.030241783 |
| TXNIP        | -1.084928848 | 0.030444686 |
| LOC339874    | -1.329549335 | 0.030642293 |
| FJX1         | -1.294053855 | 0.030831324 |
| CBLN4        | -1.378709688 | 0.030866727 |
| TMEM233      | -1.64395114  | 0.031040619 |
| FBXW10       | -1.69541366  | 0.031044054 |
| FAM182B      | -1.422770796 | 0.031083053 |
| CLSN3        | -1.021508812 | 0.031205026 |
| LOC401176    | -1.086045294 | 0.031396161 |
| LOC284440    | -1.896491295 | 0.031500489 |
| FOXD4L2      | -1.606596105 | 0.03158801  |
| LOC440040    | -1.741986916 | 0.031749679 |
| PLA2G4D      | -1.099461822 | 0.031877674 |
| UCA1         | -1.01387971  | 0.032276312 |
| CDHR3        | -1.08495889  | 0.032403131 |
| C1orf210     | -1.170116193 | 0.032518098 |
| ATPAF1-AS1   | -1.196638755 | 0.032633071 |
| KCNN1        | -1.336737532 | 0.032717009 |
| CCBP2        | -1.392009748 | 0.032725126 |
| SIX1         | -1.454862656 | 0.032735318 |
| BDNF-AS1     | -1.221198923 | 0.03296723  |
| DEFB109P1    | -1.057745289 | 0.033201323 |
| SDCBP2       | -1.538187581 | 0.0332768   |
| TTY1         | -2.072557213 | 0.033404663 |
| DEFB119      | -1.053985273 | 0.033438855 |
| FLJ41455     | -1.166749187 | 0.033784644 |
| OR4P4        | -1.371407945 | 0.033883754 |

|              |              |             |
|--------------|--------------|-------------|
| PPP6R1       | -1.179693089 | 0.033968097 |
| HOXC11       | -1.997689022 | 0.034007941 |
| GNLY         | -1.643423576 | 0.034061925 |
| NPIP         | -1.486110529 | 0.03408186  |
| NRG2         | -1.015113347 | 0.034245353 |
| ANGPTL4      | -1.393778156 | 0.034459222 |
| LOC646034    | -1.001889103 | 0.034597299 |
| HABP2        | -1.301339363 | 0.03461796  |
| ZNF423       | -1.980593969 | 0.034959041 |
| FREM2        | -1.069025536 | 0.034967088 |
| MFSD6L       | -1.603958994 | 0.035134208 |
| DRD5         | -1.656023961 | 0.035143048 |
| IL2RG        | -1.173313236 | 0.035183232 |
| GYG2         | -1.132219006 | 0.035413956 |
| GOLGA6L5     | -1.303623788 | 0.035481508 |
| ZFP14        | -1.066569657 | 0.035713203 |
| ZNF408       | -1.458536486 | 0.035869622 |
| PDE6A        | -1.340957326 | 0.035942584 |
| LOC283501    | -1.146835618 | 0.036081664 |
| ACSS3        | -1.008693695 | 0.036138024 |
| SALL4        | -1.849413011 | 0.036259533 |
| GNAL         | -1.055019361 | 0.036373951 |
| POTEB        | -1.26787212  | 0.036613892 |
| CLEC6A       | -1.279868745 | 0.036856162 |
| OR2T4        | -1.035695997 | 0.037049994 |
| SNAR-E       | -1.897741428 | 0.037196815 |
| PATZ1        | -1.257132457 | 0.037253527 |
| LOC644242    | -1.743565212 | 0.037322885 |
| FGD5         | -1.240715928 | 0.037463143 |
| PFN1         | -1.257936007 | 0.037514869 |
| BOK          | -1.218604856 | 0.037540523 |
| LOC100188947 | -1.088534235 | 0.037655911 |
| MYH7B        | -1.244046578 | 0.037690753 |
| KCNK9        | -1.161182866 | 0.038165798 |
| MYCT1        | -1.272275055 | 0.03827397  |
| UXT          | -1.513861126 | 0.038282263 |
| LOC100128591 | -1.041305882 | 0.038405122 |
| LOC643401    | -1.528228139 | 0.0387258   |
| BMP3         | -1.013460057 | 0.038853531 |
| LOC728073    | -1.300573896 | 0.03889099  |
| LOC645586    | -1.43688601  | 0.038987533 |
| CNBD1        | -1.211855153 | 0.039078868 |
| MRGPRD       | -1.110715153 | 0.039161634 |
| RASSF6       | -1.281287688 | 0.039274078 |
| CPN2         | -1.167607258 | 0.03934479  |
| MKL2         | -1.223852214 | 0.039385532 |
| LOC388849    | -1.136587231 | 0.039407217 |
| PAK3         | -1.673343832 | 0.039422863 |
| LOC728558    | -1.019858598 | 0.039438896 |
| FLJ37035     | -1.315717007 | 0.039650595 |
| SLC8A2       | -1.386795706 | 0.039743766 |
| KRT78        | -1.614367727 | 0.03980037  |
| IRS4         | -2.12484141  | 0.039902823 |
| FLJ42200     | -1.00833079  | 0.039927298 |
| ZXDA         | -1.244170965 | 0.039982862 |
| ALDOC        | -1.317916764 | 0.040164092 |
| LOC644093    | -1.099637818 | 0.040323141 |
| TMEM229A     | -1.422762432 | 0.040397645 |

|              |              |             |
|--------------|--------------|-------------|
| GPR21        | -1.076508006 | 0.040977333 |
| MIR137HG     | -1.141045028 | 0.040995612 |
| LOC283728    | -1.441907458 | 0.041039168 |
| EBF2         | -1.479257202 | 0.041048369 |
| LOC100130876 | -1.007045975 | 0.041148234 |
| FLJ37505     | -2.119185177 | 0.041158513 |
| TREH         | -1.078089427 | 0.041283436 |
| PTPRS        | -1.216979001 | 0.041295222 |
| LCP1         | -1.080456412 | 0.041339852 |
| TMEM143      | -1.025477531 | 0.0415218   |
| CLEC18C      | -1.310442251 | 0.04153398  |
| NKD2         | -1.117383439 | 0.041557352 |
| LOC100128437 | -1.674465702 | 0.041699145 |
| PLA2G1B      | -1.284625973 | 0.041723192 |
| NFE4         | -1.237926515 | 0.042026724 |
| LOC284395    | -1.015428604 | 0.042110967 |
| FGFRL1       | -1.687026463 | 0.042206987 |
| TAF7L        | -1.305145081 | 0.042381734 |
| LRRC55       | -1.274782579 | 0.042563845 |
| LOC728196    | -1.204850762 | 0.042813746 |
| TNN          | -1.513685557 | 0.043061888 |
| POM121L4P    | -1.806685189 | 0.043065169 |
| LOC349196    | -1.556257753 | 0.043070628 |
| OR8K3        | -1.10730766  | 0.043332963 |
| JAKMIP3      | -1.799744795 | 0.043643901 |
| EML2         | -1.422893416 | 0.043832637 |
| GPR172B      | -1.022380429 | 0.044035695 |
| SNAR-G1      | -1.197264038 | 0.04410191  |
| POT1         | -2.267171725 | 0.044127152 |
| LOC553137    | -1.026302163 | 0.044319814 |
| LOC415056    | -1.080834174 | 0.044678696 |
| PRSS38       | -1.286498692 | 0.044804054 |
| DKK4         | -1.017974887 | 0.044855969 |
| COL6A2       | -1.033899214 | 0.044895882 |
| LOC100506514 | -1.570264971 | 0.044902616 |
| C1orf187     | -1.397053624 | 0.04502353  |
| ISLR2        | -1.16409465  | 0.045111695 |
| LOC339788    | -1.223511987 | 0.045117902 |
| ASCL4        | -1.272019573 | 0.045216009 |
| MATN         | -1.24357793  | 0.045233225 |
| DSCR10       | -1.310870451 | 0.045292472 |
| LOC100131792 | -1.18393803  | 0.045341493 |
| TCEB3B       | -1.125130314 | 0.045887116 |
| LOC100128402 | -1.043301589 | 0.04615326  |
| MAGEB10      | -1.181040158 | 0.046334982 |
| OR13H1       | -1.118139456 | 0.046533185 |
| LOC100652805 | -1.183370456 | 0.046571714 |
| DPY19L2P3    | -1.286762701 | 0.046701518 |
| BRD7         | -1.15453395  | 0.04688221  |
| LOC441956    | -1.13498494  | 0.047262021 |
| SMCR5        | -2.084467745 | 0.047757312 |
| LOC391767    | -1.329142723 | 0.048017608 |
| RABL2B       | -1.281723221 | 0.048047275 |
| SHOX2        | -1.165353588 | 0.04813797  |
| LOC157627    | -1.140815816 | 0.048336564 |
| USP17        | -1.544554885 | 0.04875912  |
| TUBB3        | -1.056022156 | 0.048768946 |
| MBD3L1       | -1.135320811 | 0.048860296 |

|              |              |             |
|--------------|--------------|-------------|
| LOC100131129 | -1.491257954 | 0.048877599 |
| PAX8         | -1.070456908 | 0.049082517 |
| HPSE2        | -1.117748218 | 0.04909936  |
| KRT222       | -2.596636658 | 0.049224049 |
| RN28S1       | -3.269523552 | 0.049236383 |
| LOC284014    | -1.40771301  | 0.049808008 |
| DEFB136      | -1.031874436 | 0.049936131 |
| PEG10        | -1.579451597 | 0.049947281 |
| LOC100505880 | -1.332848007 | 0.049993873 |
