# Supplementary material for: Identification of Diagnostic Signatures and Immune Cell Infiltration Characteristics in Rheumatoid Arthritis by Integrating Bioinformatic Analysis and Machine-Learning Strategies
Source: PubMed Central journal article supplement (PMC8526926; doi:10.3389/fimmu.2021.724934), 2021-10-06
Supplement: Table_3.pdf [file Table_3.pdf]

| Gene      | logFC        | P.Value  |
|-----------|--------------|----------|
| PHLDA3    | 1.199048656  | 9.25E-45 |
| CEBPB     | 1.241452106  | 1.87E-43 |
| NOC2L     | 1.054157968  | 4.71E-41 |
| C21orf104 | 1.094668895  | 9.03E-39 |
| C22orf30  | 1.153553841  | 5.46E-37 |
| RNF157    | 1.30594419   | 6.29E-37 |
| GABRD     | 1.133416011  | 9.98E-37 |
| DEFA3     | 1.2308677    | 2.42E-35 |
| ERAF      | 1.107269179  | 5.45E-34 |
| LEPRE1    | 1.000367891  | 5.86E-34 |
| C22orf24  | 1.09009361   | 6.05E-34 |
| MEOX2     | 1.574764784  | 7.51E-34 |
| NPHS2     | 1.126151175  | 3.32E-33 |
| SCOC      | 1.380043429  | 4.10E-33 |
| HOXA11    | 1.123622151  | 4.80E-33 |
| EDA2R     | 1.195850945  | 3.65E-32 |
| IL1R2     | 1.305042294  | 6.17E-32 |
| EGR4      | 1.041559419  | 1.00E-31 |
| NEK6      | 1.027950531  | 3.22E-31 |
| EGR1      | 1.061155049  | 1.12E-28 |
| CPB2      | 1.400530343  | 2.30E-28 |
| CA1       | 1.002490805  | 5.38E-27 |
| STXBP6    | 1.553299056  | 6.06E-27 |
| OR2A9P    | 1.253087218  | 1.33E-26 |
| MC5R      | 1.036810993  | 4.81E-25 |
| PDE6H     | 1.089835256  | 1.01E-24 |
| PIGL      | 1.035832445  | 6.26E-24 |
| MTERF     | 1.242024573  | 4.80E-23 |
| H19       | 1.018687584  | 1.10E-22 |
| SYS1      | 1.015543407  | 1.36E-18 |
| MYEF2     | 1.093735465  | 2.80E-18 |
| S100A12   | 1.171833665  | 1.27E-16 |
| HCFC2     | 2.029303789  | 1.69E-12 |
| MAP4K5    | -1.229498817 | 1.43E-45 |
| C2orf16   | -1.534706926 | 1.00E-43 |
| PRKD2     | -1.243991856 | 8.08E-38 |
| LSP1      | -1.387742234 | 2.86E-37 |
| NNMT      | -2.025751034 | 8.85E-36 |
| SERPINB13 | -1.115055352 | 1.18E-35 |
| HOXA2     | -2.574248181 | 1.49E-35 |
| GNLY      | -1.556435479 | 7.13E-34 |
| SCN4B     | -1.183116631 | 1.21E-32 |
| ALDOC     | -1.484393521 | 2.37E-32 |
| CSRP2     | -1.184666407 | 4.29E-31 |
| IL32      | -1.324543475 | 6.55E-31 |
| DDX24     | -1.002424471 | 5.18E-30 |
| CLIP2     | -1.096514219 | 3.82E-28 |
| GHDC      | -1.042260233 | 9.48E-28 |
| MIER1     | -1.180828161 | 1.74E-26 |
| FAM64A    | -1.297558349 | 1.29E-24 |
| FAM95B1   | -1.383160816 | 5.08E-23 |
| DPCR1     | -1.016706275 | 1.12E-18 |
| ACTG1     | -1.00541011  | 4.32E-17 |
| IL26      | -1.048712845 | 5.84E-16 |
| ZFP14     | -1.135568153 | 2.19E-14 |
| HPSE2     | -1.007651552 | 6.99E-11 |
| MAT2B     | -1.047445495 | 4.97E-10 |

CLSTN3 -1.201064654 8.80E-09
