# Supplementary material for: Identification of Diagnostic Signatures and Immune Cell Infiltration Characteristics in Rheumatoid Arthritis by Integrating Bioinformatic Analysis and Machine-Learning Strategies
Source: PubMed Central journal article supplement (PMC8526926; doi:10.3389/fimmu.2021.724934), 2021-10-06
Supplement: Table_4.pdf [file Table_4.pdf]

Supplementary Table 4

IL32  
MEOX2  
OR2A9P  
RNF157  
CLIP2  
HPSE2  
EGR1  
EGR4  
H19  
EDA2R  
STXBP6  
SCOC  
SYS1  
CLSTN3  
FAM95B1  
PIGL  
S100A12  
IL26  
LEPRE1  
C22orf30  
ALDOC  
PHLDA3  
NOC2L  
C22orf24  
PDE6H  
MYEF2  
DDX24  
GABRD  
MAP4K5  
MC5R  
MIER1  
HOXA11  
LSP1  
C21orf104  
CPB2  
C2orf16  
FAM64A  
DEFA3  
MTERF  
ZFP14  
HOXA2  
ACTG1  
GHDC  
DPCR1  
NPHS2  
SERPINB13  
CSRP2  
HCFC2  
SCN4B  
PRKD2  
GNLY  
NNMT  
MAT2B  
NEK6
